# Supplementary material for: Nasopharyngeal Microbiome Community Composition and Structure Is Associated with Severity of COVID-19 Disease and Breathing Treatment
Source: MDPI journal article supplement (doi:10.3390/applmicrobiol1020014), 2021-07-05
Supplement: s1 [file s1]

**Table S2.** Individual attributes for all (n=99) patients whose samples were included in this study.

| COVID-19 |        |     |         |            |         |     |     |       |        |
|----------|--------|-----|---------|------------|---------|-----|-----|-------|--------|
| Sample   | Status | PPI | Smoker  | Antibiotic | Inhaler | BMI | Age | Race  | Gender |
| c1       | +      | No  | No      | No         | No      | 35  | 33  | White | Female |
| c100     | +      | No  | Former  | No         | No      | 21  | 78  | White | Female |
| c12      | +      | No  | No      | No         | No      | 27  | 70  | White | Female |
| c13      | +      | No  | No      | No         | No      | 46  | 51  | Black | Female |
| c14      | +      | No  | No      | No         | No      | 16  | 49  | Black | Male   |
| c15      | +      | No  | No      | No         | No      | 28  | 26  | White | Male   |
| c16      | +      | Yes | Yes     | No         | Yes     | 22  | 54  | Black | Female |
| c17      | +      | No  | No      | No         | Yes     | 29  | 47  | Black | Male   |
| c18      | +      | No  | Yes     | No         | Yes     | 36  | 20  | White | Male   |
| c19      | +      | Yes | No      | Yes        | No      | 37  | 65  | Black | Female |
| c2       | +      | No  | Unknown | No         | No      |     | 45  | Black | Male   |
| c20      | +      | No  | No      | No         | No      | 35  | 61  | White | Male   |
| c21      | +      | No  | No      | Yes        | No      | 32  | 68  | White | Female |
| c22      | +      | No  | No      | No         | No      | 36  | 82  | White | Female |
| c25      | +      | No  | No      | No         | No      | 41  | 50  | Black | Male   |
| c26      | +      | No  | No      | No         | No      | 58  | 40  | White | Female |
| c28      | +      | No  | No      | No         | No      | 35  | 48  | White | Female |
| c29      | +      | No  | No      | No         | Yes     | 43  | 44  | Black | Female |
| c3       | +      | Yes | Former  | No         | No      | 23  | 89  | White | Female |
| c30      | +      | No  | No      | No         | No      | 40  | 53  | Black | Female |
| c31      | +      | No  | No      | No         | No      | 28  | 37  | Black | Female |
| c32      | +      | Yes | No      | No         | Yes     | 46  | 48  | White | Male   |
| c33      | +      | No  | No      | No         | Yes     | 28  | 40  | White | Male   |
| c34      | +      | No  | Former  | No         | No      | 25  | 49  | White | Male   |
| c35      | +      | Yes | No      | Yes        | No      | 27  | 79  | Black | Male   |
| c36      | +      | No  | Yes     | Yes        | No      | 26  | 33  | Black | Male   |
| c37      | +      | No  | Yes     | Yes        | Yes     | 26  | 50  | Black | Female |
| c38      | +      | Yes | No      | Yes        | Yes     | 42  | 72  | White | Female |
| c39      | +      | No  | No      | No         | Yes     | 30  | 57  | Black | Male   |
| c40      | +      | No  | No      | No         | No      | 22  | 60  | White | Male   |
| c41      | +      | No  | No      | No         | No      | 25  | 25  | White | Female |
| c42      | +      | No  | No      | No         | No      | 25  | 58  | White | Female |
| c43      | +      | Yes | No      | No         | Yes     | 37  | 45  | Black | Female |
| c44      | +      | No  | No      | No         | No      | 34  | 28  | Black | Female |
| c45      | +      | No  | No      | No         | No      | 33  | 42  | Black | Female |
| c46      | +      | No  | No      | Yes        | No      | 32  | 57  | Black | Male   |

|     |   |         |         |     |     |    |    |       |        |
|-----|---|---------|---------|-----|-----|----|----|-------|--------|
| c47 | + | No      | No      | No  | Yes | 32 | 68 | White | Female |
| c48 | + | No      | No      | Yes | No  | 39 | 27 | Black | Female |
| c49 | + | Unknown |         |     |     | 36 | 45 | Black | Male   |
| c50 | + | No      | No      | Yes | Yes | 32 | 63 | Black | Female |
| c51 | + | No      | No      | No  | No  | 32 | 54 | Black | Female |
| c54 | + | Yes     | No      | No  | No  | 28 | 59 | White | Female |
| c55 | + | No      | Yes     | No  | Yes | 33 | 69 | White | Male   |
| c56 | + | No      | No      | No  | No  | 34 | 58 | Black | Female |
| c58 | + | No      | No      | No  | Yes | 33 | 69 | Black | Female |
| c6  | + | No      | No      | No  | No  | 27 | 19 | Black | Female |
| c61 | + | No      | No      | No  | Yes | 31 | 72 | White | Male   |
| c62 | + | No      | No      | Yes | No  | 33 | 50 | Black | Female |
| c63 | + | No      | No      | No  | No  | 25 | 64 | White | Male   |
| c64 | + | No      | No      | No  | No  | 21 | 29 | White | Female |
| c65 | + | No      | No      | No  | No  | 38 | 67 | Black | Female |
| c66 | + | No      | Former  | No  | No  | 30 | 43 | White | Female |
| c68 | + | Yes     | Former  | No  | No  | 22 | 32 | White | Female |
| c69 | + | No      | Yes     | No  | No  | 35 | 45 | Black | Male   |
| c70 | + | No      | Unknown | No  | No  | 34 | 33 | White | Male   |
| c71 | + | Yes     | No      | No  | No  | 38 | 68 | Black | Female |
| c74 | + | No      | No      | No  | No  | 41 | 45 | Black | Male   |
| c75 | + | No      | Former  | No  | No  | 42 | 57 | White | Male   |
| c76 | + | No      | Yes     | No  | Yes | 29 | 24 | White | Female |
| c77 | + | No      | No      | No  | No  | 34 | 49 | Black | Female |
| c78 | + | Yes     | No      | No  | No  | 32 | 55 | Black | Female |
| c79 | + | No      | No      | Yes | Yes | 54 | 32 | Black | Female |
| c80 | + | No      | No      | No  | No  | 34 | 65 | White | Female |
| c81 | + | No      | No      | No  | No  | 55 | 35 | Black | Female |
| c82 | + | No      | Former  | No  | No  | 29 | 76 | Black | Female |
| c84 | + | No      | No      | No  | No  | 32 | 67 | White | Male   |
| c85 | + | Yes     | No      | No  | Yes | 39 | 56 | Black | Female |
| c86 | + | No      | Former  | No  | No  | 29 | 50 | Black | Male   |
| c88 | + | No      | No      | No  | No  | 28 | 52 | Black | Female |
| c89 | + | No      | No      | No  | No  | 38 | 46 | Black | Female |
| c9  | + | No      | No      | No  | Yes | 53 | 25 | White | Female |
| c90 | + | No      | No      | No  | No  | 31 | 21 | Black | Male   |
| c91 | + | Yes     | No      | Yes | Yes | 35 | 55 | Black | Female |
| c92 | + | No      | Yes     | No  | No  | 21 | 50 | Black | Male   |
| c93 | + | Yes     | Former  | No  | Yes | 27 | 92 | White | Female |
| c94 | + | No      | No      | Yes | No  | 22 | 82 | White | Female |

|     |   |     |         |     |     |    |    |       |        |
|-----|---|-----|---------|-----|-----|----|----|-------|--------|
| c95 | + | No  | No      | Yes | No  | 25 | 27 | Black | Female |
| c96 | + | No  | No      | No  | No  | 25 | 65 | White | Female |
| c97 | + | No  | No      | Yes | No  | 27 | 66 | Black | Female |
| n1  | - | Yes | No      | No  | No  | 25 | 70 | Black | Female |
| n10 | - | No  | Unknown | No  | No  | 25 | 55 | White | Female |
| n11 | - | No  | No      | No  | No  | 28 | 36 | White | Female |
| n12 | - | No  | Yes     | No  | No  | 25 | 39 | White | Female |
| n13 | - | No  | Yes     | No  | Yes | 43 | 44 | White | Female |
| n14 | - | No  | No      | No  | Yes | 32 | 58 | Black | Female |
| n15 | - | Yes | Former  | No  | Yes | 29 | 62 | Black | Male   |
| n16 | - | No  | No      | No  | Yes | 24 | 67 | Black | Female |
| n17 | - | Yes | No      | No  | No  | 29 | 50 | Black | Female |
| n18 | - | No  | No      | Yes | No  | 34 | 42 | Black | Male   |
| n19 | - | No  | No      | No  | No  | 28 | 50 | Black | Female |
| n2  | - | Yes | Unknown | No  | Yes | 26 | 37 | White | Female |
| n20 | - | No  | No      | No  | No  | 26 | 23 | Black | Male   |
| n3  | - | No  | Former  | No  | Yes | 28 | 78 | White | Male   |
| n4  | - | Yes | No      | No  | Yes | 45 | 62 | Black | Female |
| n5  | - | No  | Former  | Yes | No  | 25 | 50 | White | Male   |
| n6  | - | No  | No      | No  | No  | 21 | 48 | White | Female |
| n7  | - | No  | No      | No  | No  | 27 | 47 | Black | Female |
| n8  | - | No  | Yes     | No  | Yes | 28 | 59 | White | Male   |
| n9  | - | No  | Unknown | No  | Yes | 27 | 29 | Black | Male   |

PPI, Proton pump inhibitor; BMI, body mass index.
