# Supplementary material for: Nasopharyngeal Microbiome Community Composition and Structure Is Associated with Severity of COVID-19 Disease and Breathing Treatment
Source: MDPI journal article supplement (doi:10.3390/applmicrobiol1020014), 2021-07-05
Supplement: s1 [file s1]

**Table S3.** P-values for differences in alpha diversity for 13 attributes.

| <b>Metric</b>     | <b>Attribute</b>     | <b>Patients Included</b> | <b><i>p</i>-value</b> | <b>Test</b>                        |
|-------------------|----------------------|--------------------------|-----------------------|------------------------------------|
| invsimpson        | Breathing assistance | Covid-19+                | 0.642                 | KWRST                              |
| shannon           | Breathing assistance | Covid-19+                | 0.353                 | KWRST                              |
| invsimpson        | Disposition          | Covid-19+                | 0.354                 | KWRST                              |
| shannon           | Disposition          | Covid-19+                | 0.268                 | KWRST                              |
| invsimpson        | Inhaler              | Covid-19+                | 0.853                 | KWRST                              |
| shannon           | Inhaler              | Covid-19+                | 0.884                 | KWRST                              |
| invsimpson        | Inpatient            | Covid-19+                | 0.958                 | KWRST                              |
| shannon           | Inpatient            | Covid-19+                | 0.692                 | KWRST                              |
| invsimpson        | Severity             | Covid-19+                | 0.336                 | KWRST                              |
| shannon           | Severity             | Covid-19+                | 0.298                 | KWRST                              |
| invsimpson        | COVID-19 status      | All                      | 0.903                 | KWRST                              |
| shannon           | COVID-19 status      | All                      | 0.917                 | KWRST                              |
| <b>invsimpson</b> | <b>Age</b>           | <b>All</b>               | <b>0.007</b>          | <b>Spearman's rank correlation</b> |
| <b>shannon</b>    | <b>Age</b>           | <b>All</b>               | <b>0.016</b>          | <b>Spearman's rank correlation</b> |
| <b>invsimpson</b> | <b>Age</b>           | <b>All</b>               | <b>0.002</b>          | <b>LRM</b>                         |
| <b>shannon</b>    | <b>Age</b>           | <b>All</b>               | <b>0.010</b>          | <b>LRM</b>                         |
| invsimpson        | Antibiotic           | All                      | 0.746                 | KWRST                              |
| shannon           | Antibiotic           | All                      | 0.527                 | KWRST                              |
| invsimpson        | BMI                  | All                      | 0.105                 | SRC                                |
| shannon           | BMI                  | All                      | 0.097                 | SRC                                |
| invsimpson        | PPI                  | All                      | 0.743                 | KWRST                              |
| shannon           | PPI                  | All                      | 0.826                 | KWRST                              |
| <b>invsimpson</b> | <b>Smoker</b>        | <b>All</b>               | <b>0.047</b>          | <b>KWRST</b>                       |
| shannon           | Smoker               | All                      | 0.069                 | KWRST                              |
| invsimpson        | Race                 | All                      | 0.083                 | KWRST                              |
| shannon           | Race                 | All                      | 0.081                 | KWRST                              |
| invsimpson        | Sex                  | All                      | 0.349                 | KWRST                              |
| shannon           | Sex                  | All                      | 0.279                 | KWRST                              |

KWRS, Kruskal Wallis Rank Sum test; SCR, Spearman's Rank Correlation test; LR, linear regression; BMI, body mass index; PPI, proton pump inhibitor
