# Supplementary material for: Nasopharyngeal Microbiome Community Composition and Structure Is Associated with Severity of COVID-19 Disease and Breathing Treatment
Source: MDPI journal article supplement (doi:10.3390/applmicrobiol1020014), 2021-07-05
Supplement: s1 [file s1]

**Table S4.** Number of individuals in which each genera was present by COVID-19 positivity, use of breathing assistance, and use of antibiotics.

| Genus                           | COVID-19 Status |                 | Breathing Assistance |            | Antibiotic Use |            |
|---------------------------------|-----------------|-----------------|----------------------|------------|----------------|------------|
|                                 | Negative (n=20) | Positive (n=79) | No (n=67)            | Yes (n=12) | No (n=81)      | Yes (n=17) |
| <i>Acinetobacter</i>            | 5               | 24              | 20                   | 4          | 26             | 3          |
| <i>Actinomyces</i>              | 5               | 15              | 14                   | 1          | 19             | 1          |
| <i>Aggregatibacter</i>          | 4               | 11              | 8                    | 3          | 12             | 2          |
| <i>Bradyrhizobium</i>           | 3               | 16              | 14                   | 2          | 15             | 4          |
| <i>Burkholderia</i>             | 6               | 18              | 15                   | 3          | 20             | 4          |
| <i>Burkholderiaceae_u_g</i>     | 3               | 13              | 12                   | 1          | 13             | 3          |
| <i>Corynebacterium</i>          | 20              | 78              | 66                   | 12         | 80             | 17         |
| <i>Cutibacterium</i>            | 14              | 66              | 60                   | 6          | 67             | 12         |
| <i>Delftia</i>                  | 5               | 25              | 23                   | 2          | 28             | 2          |
| <i>Dolosigranulum</i>           | 11              | 47              | 41                   | 6          | 44             | 13         |
| <i>Enterobacter</i>             | 16              | 61              | 51                   | 10         | 64             | 12         |
| <i>Finegoldia</i>               | 6               | 24              | <b>24*</b>           | <b>0*</b>  | 24             | 5          |
| <i>Kocuria</i>                  | 0               | 12              | 11                   | 1          | 12             | 0          |
| <i>Micrococcus</i>              | 3               | 26              | 23                   | 3          | 23             | 5          |
| <i>Mycobacterium</i>            | 2               | 16              | 11                   | 5          | 14             | 3          |
| <i>Neisseria</i>                | 5               | 13              | 11                   | 2          | 15             | 2          |
| <i>Peptoniphilus</i>            | 4               | 19              | <b>19*</b>           | <b>0*</b>  | 18             | 4          |
| <i>Pilimelia</i>                | 2               | 7               | 5                    | 2          | 8              | 1          |
| <i>Porphyromonas</i>            | 4               | 4               | 3                    | 1          | 8              | 0          |
| <i>Prevotella</i>               | 11              | 18              | 14                   | 4          | 25             | 4          |
| <i>Propionibacteriaceae_u_g</i> | 13              | 36              | 30                   | 6          | 36             | 13         |
| <i>Propionibacterium</i>        | 13              | 46              | 43                   | 3          | 50             | 8          |
| <i>Rothia</i>                   | 10              | 24              | 19                   | 5          | 28             | 5          |
| <i>Serratia</i>                 | <b>3*</b>       | <b>33*</b>      | 29                   | 4          | 30             | 6          |
| <i>Staphylococcus</i>           | 20              | 76              | 65                   | 11         | 78             | 17         |
| <i>Streptococcus</i>            | 13              | 43              | 38                   | 5          | 46             | 9          |
| <i>Veillonella</i>              | 11              | 25              | 21                   | 4          | 31             | 4          |

\*Significant difference
