# Supplementary material for: Nasopharyngeal Microbiome Community Composition and Structure Is Associated with Severity of COVID-19 Disease and Breathing Treatment
Source: MDPI journal article supplement (doi:10.3390/applmicrobiol1020014), 2021-07-05
Supplement: s1 [file s1]

**Table S5.** P-values for the differences in relative abundance for COVID-19 status, use of breathing assistance, and use of antibiotics.

| Attribute                   | Genus                       | <i>p</i> -value |
|-----------------------------|-----------------------------|-----------------|
| <b>COVID-19 status</b>      | <b><i>Serratia</i></b>      | <b>0.028</b>    |
| <b>COVID-19 status</b>      | <b><i>Veillonella</i></b>   | <b>0.038</b>    |
| COVID-19 status             | <i>Neisseria</i>            | 0.104           |
| COVID-19 status             | <i>Peptoniphilus</i>        | 0.417           |
| COVID-19 status             | <i>Enterobacter</i>         | 0.585           |
| COVID-19 status             | <i>Finegoldia</i>           | 0.717           |
| COVID-19 status             | <i>Prevotella</i>           | 0.753           |
| COVID-19 status             | <i>Actinomyces</i>          | 0.760           |
| COVID-19 status             | <i>Staphylococcus</i>       | 0.864           |
| COVID-19 status             | <i>Rothia</i>               | 0.940           |
| COVID-19 status             | <i>Streptococcus</i>        | 0.961           |
| <b>Breathing Assistance</b> | <b><i>Enterobacter</i></b>  | <b>0.007</b>    |
| <b>Breathing Assistance</b> | <b><i>Prevotella</i></b>    | <b>0.008</b>    |
| <b>Breathing Assistance</b> | <b><i>Veillonella</i></b>   | <b>0.012</b>    |
| <b>Breathing Assistance</b> | <b><i>Streptococcus</i></b> | <b>0.012</b>    |
| <b>Breathing Assistance</b> | <b><i>Rothia</i></b>        | <b>0.017</b>    |
| <b>Breathing Assistance</b> | <b><i>Serratia</i></b>      | <b>0.024</b>    |
| Breathing Assistance        | <i>Staphylococcus</i>       | 0.229           |
| <b>Antibiotic</b>           | <b><i>Finegoldia</i></b>    | <b>0.009</b>    |
| <b>Antibiotic</b>           | <b><i>Serratia</i></b>      | <b>0.018</b>    |
| Antibiotic                  | <i>Peptoniphilus</i>        | 0.050           |
| Antibiotic                  | <i>Rothia</i>               | 0.088           |
| Antibiotic                  | <i>Prevotella</i>           | 0.114           |
| Antibiotic                  | <i>Neisseria</i>            | 0.180           |
| Antibiotic                  | <i>Veillonella</i>          | 0.195           |
| Antibiotic                  | <i>Enterobacter</i>         | 0.197           |
| Antibiotic                  | <i>Staphylococcus</i>       | 0.240           |
