# Supplementary material for: Nasopharyngeal Microbiome Community Composition and Structure Is Associated with Severity of COVID-19 Disease and Breathing Treatment
Source: MDPI journal article supplement (doi:10.3390/applmicrobiol1020014), 2021-07-05
Supplement: s1 [file s1]

**Table S1.** Four attributes for all COVID-19 Positive individuals (n=79) whose samples were analyzed.

| <b>Sample</b> | <b>Inpatient</b> | <b>Any Breathing Assistive Device</b> | <b>Disposition</b> | <b>Severity<sup>1</sup></b> |
|---------------|------------------|---------------------------------------|--------------------|-----------------------------|
| c1            | No               | No                                    | Alive              | Mild                        |
| c100          | Yes              | Yes                                   | Dead               | Severe                      |
| c12           | No               | No                                    | Alive              | Mild                        |
| c13           | No               | No                                    | Alive              | Mild                        |
| c14           | No               | No                                    | Alive              | Mild                        |
| c15           | No               | No                                    | Alive              | Mild                        |
| c16           | No               | No                                    | Alive              | Mild                        |
| c17           | Yes              | Yes                                   | Alive              | Severe                      |
| c18           | No               | No                                    | Alive              | Mild                        |
| c19           | No               | No                                    | Alive              | Mild                        |
| c2            | No               | No                                    | Alive              | Mild                        |
| c20           | No               | No                                    | Alive              | Moderate                    |
| c21           | No               | No                                    | Alive              | Mild                        |
| c22           | Yes              | Yes                                   | Alive              | Severe                      |
| c25           | No               | No                                    | Alive              | Moderate                    |
| c26           | No               | No                                    | Alive              | Mild                        |
| c28           | No               | No                                    | Alive              | Mild                        |
| c29           | No               | No                                    | Alive              | Low                         |
| c3            | Yes              | Yes                                   | Dead               | Severe                      |
| c30           | No               | No                                    | Alive              | Low                         |
| c31           | No               | No                                    | Alive              | Mild                        |
| c32           | Yes              | No                                    | Alive              | High                        |
| c33           | No               | No                                    | Alive              | Mild                        |
| c34           | No               | No                                    | Alive              | Mild                        |
| c35           | No               | No                                    | Alive              | Mild                        |
| c36           | No               | No                                    | Alive              | Moderate                    |
| c37           | No               | No                                    | Alive              | Moderate                    |
| c38           | Yes              | Yes                                   | Dead               | Severe                      |
| c39           | No               | No                                    | Alive              | Mild                        |
| c40           | No               | No                                    | Alive              | Moderate                    |
| c41           | No               | No                                    | Alive              | Mild                        |
| c42           | No               | No                                    | Alive              | Mild                        |
| c43           | No               | No                                    | Alive              | Moderate                    |
| c44           | No               | No                                    | Alive              | Mild                        |
| c45           | No               | No                                    | Alive              | Mild                        |
| c46           | No               | No                                    | Alive              | Mild                        |
| c47           | No               | No                                    | Alive              | Moderate                    |
| c48           | No               | No                                    | Alive              | Mild                        |
| c49           | No               | No                                    | Alive              | Moderate                    |
| c50           | No               | No                                    | Alive              | Mild                        |
| c51           | No               | No                                    | Alive              | Mild                        |

|     |     |     |       |          |
|-----|-----|-----|-------|----------|
| c54 | No  | No  | Alive | Moderate |
| c55 | Yes | Yes | Dead  | Severe   |
| c56 | No  | No  | Alive | Moderate |
| c58 | Yes | Yes | Alive | Severe   |
| c6  | No  | No  | Alive | Moderate |
| c61 | Yes | Yes | Alive | Severe   |
| c62 | No  | No  | Alive | Mild     |
| c63 | Yes | Yes | Dead  | Severe   |
| c64 | No  | No  | Alive | Mild     |
| c65 | No  | No  | Alive | Mild     |
| c66 | No  | No  | Alive | Mild     |
| c68 | No  | No  | Alive | Mild     |
| c69 | No  | No  | Alive | Moderate |
| c70 | No  | No  | Alive | Mild     |
| c71 | No  | No  | Alive | Mild     |
| c74 | No  | No  | Alive | Mild     |
| c75 | No  | No  | Alive | Mild     |
| c76 | No  | No  | Alive | Moderate |
| c77 | No  | No  | Alive | Mild     |
| c78 | No  | No  | Alive | Moderate |
| c79 | No  | No  | Alive | Moderate |
| c80 | No  | No  | Alive | Mild     |
| c81 | No  | No  | Alive | Mild     |
| c82 | No  | No  | Alive | Mild     |
| c84 | No  | No  | Alive | Mild     |
| c85 | No  | No  | Alive | Mild     |
| c86 | Yes | Yes | Alive | Severe   |
| c88 | Yes | Yes | Alive | Severe   |
| c89 | No  | No  | Alive | Moderate |
| c9  | No  | No  | Alive | Moderate |
| c90 | No  | No  | Alive | Moderate |
| c91 | No  | No  | Alive | Mild     |
| c92 | No  | No  | Alive | High     |
| c93 | Yes | Yes | Alive | Severe   |
| c94 | No  | No  | Alive | Moderate |
| c95 | No  | No  | Alive | Mild     |
| c96 | No  | No  | Alive | Mild     |
| c97 | No  | No  | Alive | Moderate |

<sup>1</sup> Low, no or very few symptoms; mild, symptoms that were treated at home; moderate, symptoms were severe enough to require an emergency visit but not admission; high, symptoms required admission; severe, symptoms required breathing assistive devices in the hospital. BMI, body mass index.
